# Supplementary material
Source: Springer Nature journal article supplement (https://www.springermedizin.de/resource/supplementary/12936_2013_2924_MOESM1_ESM.pdf/9544626)
Supplement: MOESM1 [file 9544626]

82 (64%)  
MALE

46 (36%)  
FEMALE

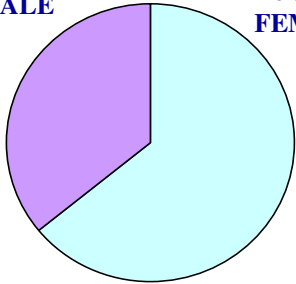

**SEX**

11 (9%) NO

6 (5%) UNKNOWN

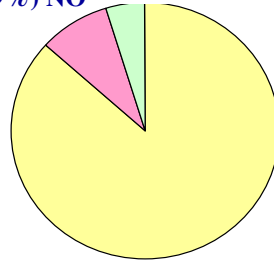

**FEVER**

111 (86%) YES

15 (11.72%) UNKNOWN

21  
(16.41%)  
YES

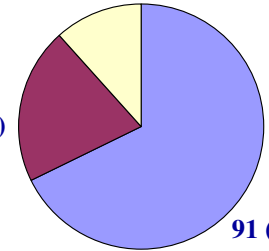

**ANTI-MALARIAL  
CHEMOPROPHYLAXIS**

118 (92%) AFRICA: 99 *Pf*, 1 *Pf+Pm*, 1 *Pf+Po*, 1 *Pf+Pow*, 1 *Pf+Poc+Pm*, 2 *Pm*, 11 *Po*, 2 *Pow*

4 (3%) ASIA: 1 *Pf*, 3 *Pv*

6 (5%) UNKNOWN: 3 *Pf*, 1 *Po*, 2 *Pv*

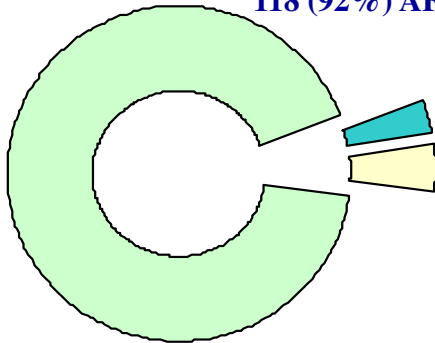

**COUNTRY OF ORIGIN/VISIT**
